# Supplementary material for: As N.E.E., da integración á inclusión
Source: Royal Society of Chemistry journal article supplement (doi:10.1039/d1dt02488d), 2009-01-01

**Medicinal Au(I) compounds targeting urease as prospective antimicrobial agents: unveiling the structural basis for enzyme inhibition**

**SUPPLEMENTARY INFORMATION**

Luca Mazzei,<sup>a,\*</sup> Lara Massai<sup>b</sup> Michele Cianci,<sup>c</sup> Luigi Messori,<sup>b</sup> Stefano Ciurli<sup>a,\*</sup>

<sup>a</sup> Laboratory of Bioinorganic Chemistry, Department of Pharmacy and Biotechnology (FaBiT), University of Bologna, Via Giuseppe Fanin 40, I-40127 Bologna (Italy)

<sup>b</sup> Department of Chemistry “Ugo Schiff”, University of Florence, Via della Lastruccia 3-13, I-50019 Sesto Fiorentino (Italy)

<sup>c</sup> Department of Agricultural, Food and Environmental Sciences, Polytechnic University of Marche, Via Brecce Bianche, I-60131 Ancona (Italy)

Luca Mazzei: ORCID 0000-0003-1335-9365

Lara Massai: ORCID 0000-0003-0765-1802

Michele Cianci: ORCID 0000-0001-5607-6061

Luigi Messori: ORCID 0000-0002-9490-8014

Stefano Ciurli: ORCID 0000-0001-9557-926X

Keywords: Nickel; urease; X-ray crystal structure; gold; phosphine; enzyme inhibition

\* Corresponding authors: [luca.mazzei2@unibo.it](mailto:luca.mazzei2@unibo.it), [stefano.ciurli@unibo.it](mailto:stefano.ciurli@unibo.it)

**Table 1-SI.** Data collection, processing and refinement statistics for the X-ray crystal structures of SPU co-crystallized in the presence of Au(PEt<sub>3</sub>)I (**3**, PDB code 7P7N) and Au(PEt<sub>3</sub>)<sub>2</sub>Cl (**4**, PDB code 7P7O).

| <b>Data collection</b>                                                                            | <b>7P7N</b><br>Au(PEt <sub>3</sub> )I ( <b>3</b> ) | <b>7P7O</b><br>Au(PEt <sub>3</sub> ) <sub>2</sub> Cl ( <b>4</b> ) |
|---------------------------------------------------------------------------------------------------|----------------------------------------------------|-------------------------------------------------------------------|
| Wavelength (Å)                                                                                    | 0.9762                                             |                                                                   |
| Detector                                                                                          | DECTRIS PILATUS 6M                                 |                                                                   |
| Crystal-to-Detector distance (mm)                                                                 | 269.4                                              |                                                                   |
| Oscillation angle (degrees)                                                                       | 0.100                                              |                                                                   |
| Number of images                                                                                  | 1800                                               |                                                                   |
| Space group                                                                                       | P6 <sub>3</sub> 22                                 |                                                                   |
| Unit cell ( <i>a</i> , <i>b</i> , <i>c</i> , Å)                                                   | 131.6 131.6 189.2                                  | 131.8, 131.8, 189.4                                               |
| Resolution range (Å) <sup>a</sup>                                                                 | 114.0–1.80 (1.83–1.80)                             | 114.1–1.87 (1.90–1.87)                                            |
| Total number of reflections <sup>a</sup>                                                          | 1180987 (61039)                                    | 1400616 (79653)                                                   |
| Unique reflections <sup>a</sup>                                                                   | 89759 (4534)                                       | 80498 (4557)                                                      |
| Multiplicity <sup>a</sup>                                                                         | 13.2 (13.5)                                        | 17.4 (17.5)                                                       |
| Completeness <sup>a</sup> (%)                                                                     | 100.0 (100.0)                                      | 100.0 (100.0)                                                     |
| R <sub>sym</sub> <sup>a,b</sup> (%)                                                               | 14.2 (230.0)                                       | 15.8 (300.1)                                                      |
| R <sub>pim</sub> <sup>a,c</sup> (%)                                                               | 5.8 (93.1)                                         | 5.0 (108.0)                                                       |
| Mean I half-set correlation CC(1/2) <sup>a</sup>                                                  | 0.999 (0.694)                                      | 0.999 (0.744)                                                     |
| Mean I/σ(I) <sup>a</sup>                                                                          | 17.0 (1.5)                                         | 17.9 (1.5)                                                        |
| <b>Refinement statistics</b>                                                                      |                                                    |                                                                   |
| Number of monomers in the asymmetric unit                                                         | 3 (αβγ)                                            | 3 (αβγ)                                                           |
| R <sub>factor</sub> <sup>d</sup> (%)                                                              | 14.7                                               | 16.3                                                              |
| R <sub>free</sub> <sup>d</sup> (%)                                                                | 17.7                                               | 20.4                                                              |
| Cruickshank's DPI for coordinate error <sup>e</sup> based on R <sub>factor</sub> (Å) <sup>e</sup> | 0.093                                              | 0.116                                                             |
| Wilson plot B-factor (Å <sup>2</sup> )                                                            | 25.3                                               | 26.9                                                              |
| Average all atom B-factor <sup>f</sup> (Å <sup>2</sup> )                                          | 31.7                                               | 38.9                                                              |
| B-factor <sup>f</sup> for the Ni atoms (Å <sup>2</sup> )                                          | 31.6; 30.3                                         | 36.1; 36.7                                                        |
| RMS (bonds) <sup>d</sup>                                                                          | 0.01                                               | 0.01                                                              |
| RMS (angles) <sup>d</sup>                                                                         | 1.69                                               | 1.63                                                              |
| Total number of atoms                                                                             | 6937                                               | 6879                                                              |
| Total number of water molecules                                                                   | 549                                                | 469                                                               |
| Solvent content (%)                                                                               | 53.2                                               | 53.6                                                              |
| Matthews Coefficient (Å <sup>3</sup> /Da)                                                         | 2.63                                               | 2.65                                                              |
| <b>Ramachandran plot<sup>d</sup></b>                                                              |                                                    |                                                                   |
| Favored regions (%)                                                                               | 95.5                                               | 95.6                                                              |
| Additionally allowed regions (%)                                                                  | 3.7                                                | 3.7                                                               |
| Disallowed regions (%)                                                                            | 0.8                                                | 0.7                                                               |

<sup>a</sup> Highest resolution bin in parentheses;

$$R_{sym} = \frac{\sum_{hkl} \sum_j |I_j - \langle I \rangle|}{\sum_{hkl} \sum_j I_j}, \text{ where } I \text{ is the intensity of a reflection, and } \langle I \rangle \text{ is the mean intensity of all symmetry related reflections } j; ^c$$

$$R_{p.i.m.} = \frac{\sum_{hkl} \left\{ [1/(N-1)]^{1/2} \sum_j |I_j - \langle I \rangle| \right\}}{\sum_{hkl} \sum_j I_j}, \text{ where } I \text{ is the intensity of a reflection, and } \langle I \rangle \text{ is the mean intensity of all symmetry related reflections } j, \text{ and } N \text{ is the multiplicity}^{[13]};$$

<sup>d</sup> Taken from REFMAC; R<sub>free</sub> is calculated using 5% of the total reflections that were randomly selected and excluded from refinement;

$$DPI = R_{factor} \cdot D_{max} \cdot compl^{-1/3} \sqrt{\frac{N_{atoms}}{(N_{refl} - N_{params})}}, \text{ where } N_{atoms} \text{ is the number of the atoms included in the refinement, } N_{refl} \text{ is the number of the reflections included in the refinement, } D_{max} \text{ is the maximum resolution of reflections included in the refinement, } compl \text{ is the completeness of the observed data, and for isotropic refinement, } N_{params} \approx 4N_{atoms};$$

<sup>e</sup> Taken from BAVEGAGE.

**Table 2-SI.** Selected distances (Å) and angles (°) around the Ni(II) ions in the crystal structures of SPU co-crystallized in the presence of Au(PEt<sub>3</sub>)I (**3**, PDB code 7P7N) and Au(PEt<sub>3</sub>)<sub>2</sub>Cl (**4**, PDB code 7P7O). The same parameters reported for the structures of native (PDB 4CEU) and Au(I)-bound SPU (PDB code 6I9Y) are reported for comparison.

|                                         | <b>7P7N</b><br>Au(PEt <sub>3</sub> )I ( <b>3</b> ) | <b>7P7O</b><br>Au(PEt <sub>3</sub> ) <sub>2</sub> Cl ( <b>4</b> ) | <b>4CEU</b><br>Native | <b>6I9Y</b><br>Au(I)-SPU |
|-----------------------------------------|----------------------------------------------------|-------------------------------------------------------------------|-----------------------|--------------------------|
| <b>Ni - L Distances (Å)</b>             |                                                    |                                                                   |                       |                          |
| Ni(1) - αLys220* Oθ1                    | 2.0                                                | 2.0                                                               | 1.9                   | 2.0                      |
| Ni(1) - O <sub>B</sub> <sup>a</sup>     | 2.1                                                | 2.1                                                               | 2.1                   | 1.9                      |
| Ni(1) - O <sub>1</sub>                  | 2.2                                                | 2.1                                                               | 2.2                   | 2.2                      |
| Ni(1) - αHis249 Nδ                      | 2.0                                                | 2.1                                                               | 2.0                   | 2.1                      |
| Ni(1) - αHis275 Nε                      | 2.1                                                | 2.0                                                               | 2.0                   | 2.2                      |
| Ni(2) - αLys220* Oθ2                    | 2.0                                                | 2.1                                                               | 2.1                   | 2.1                      |
| Ni(2) - O <sub>B</sub>                  | 2.1                                                | 2.2                                                               | 2.1                   | 2.2                      |
| Ni(2) - O <sub>2</sub>                  | 2.3                                                | 2.3                                                               | 2.1                   | 2.6                      |
| Ni(2) - αHis137 Nε                      | 2.1                                                | 2.1                                                               | 2.1                   | 2.1                      |
| Ni(2) - αHis139 Nε                      | 2.1                                                | 2.1                                                               | 2.1                   | 2.2                      |
| Ni(2) - αAsp363 Oδ1                     | 2.1                                                | 2.1                                                               | 2.1                   | 2.2                      |
| Ni(1) ••• Ni(2)                         | 3.6                                                | 3.7                                                               | 3.7                   | 3.6                      |
| O <sub>1</sub> ••• O <sub>2</sub>       | 2.1                                                | 2.0                                                               | 2.4                   | 2.2                      |
| <b>L - Ni - L Angles (°)</b>            |                                                    |                                                                   |                       |                          |
| αLys220* Oθ1 - Ni(1) - αHis249 Nδ       | 108.3                                              | 103.7                                                             | 100.4                 | 103.2                    |
| αLys220* Oθ1 - Ni(1) - αHis275 Nε       | 102.5                                              | 103.2                                                             | 107.2                 | 104.0                    |
| αLys220* Oθ1 - Ni(1) - O <sub>B</sub>   | 93.8                                               | 96.4                                                              | 96.6                  | 91.2                     |
| αLys220* Oθ1 - Ni(1) - O <sub>1</sub>   | 107.0                                              | 101.6                                                             | 108.2                 | 110.8                    |
| αHis249 Nδ - Ni(1) - αHis275 Nε         | 97.1                                               | 98.5                                                              | 98.6                  | 91.9                     |
| αHis275 Nε - Ni(1) - O <sub>B</sub>     | 95.1                                               | 96.1                                                              | 94.6                  | 93.2                     |
| O <sub>B</sub> - Ni(1) - O <sub>1</sub> | 63.0                                               | 61.2                                                              | 67.0                  | 80.2                     |
| O <sub>1</sub> - Ni(1) - αHis249 Nδ     | 93.2                                               | 94.9                                                              | 89.3                  | 86.4                     |
| αHis249 Nδ - Ni(1) - O <sub>B</sub>     | 151.9                                              | 151.6                                                             | 154.2                 | 163.1                    |
| αHis275 Nε - Ni(1) - O <sub>1</sub>     | 143.8                                              | 148.1                                                             | 141.6                 | 144.7                    |
| αLys220* Oθ2 - Ni(2) - αHis137 Nε       | 95.1                                               | 93.5                                                              | 90.8                  | 90.9                     |
| αLys220* Oθ2 - Ni(2) - αHis139 Nε       | 93.4                                               | 92.3                                                              | 91.7                  | 91.2                     |
| αLys220* Oθ2 - Ni(2) - O <sub>2</sub>   | 91.2                                               | 88.6                                                              | 92.9                  | 93.5                     |
| αLys220* Oθ2 - Ni(2) - O <sub>B</sub>   | 95.8                                               | 95.1                                                              | 95.6                  | 91.7                     |
| αAsp363 Oδ1 - Ni(2) - αHis137 Nε        | 84.4                                               | 83.5                                                              | 82.8                  | 83.6                     |
| αAsp363 Oδ1 - Ni(2) - αHis139 Nε        | 81.7                                               | 85.0                                                              | 86.4                  | 87.2                     |
| αAsp363 Oδ1 - Ni(2) - O <sub>2</sub>    | 91.6                                               | 94.8                                                              | 94.5                  | 93.1                     |
| αAsp363 Oδ1 - Ni(2) - O <sub>B</sub>    | 90.0                                               | 90.2                                                              | 89.1                  | 92.3                     |
| O <sub>2</sub> - Ni(2) - O <sub>B</sub> | 61.3                                               | 61.3                                                              | 67.7                  | 68.8                     |
| O <sub>B</sub> - Ni(2) - αHis137 Nε     | 94.8                                               | 95.8                                                              | 95.0                  | 90.1                     |
| αHis137 Nε - Ni(2) - αHis139 Nε         | 114.4                                              | 113.4                                                             | 108.5                 | 112.8                    |
| αHis139 Nε - Ni(2) - O <sub>2</sub>     | 88.5                                               | 89.3                                                              | 88.4                  | 88.0                     |
| αLys220* Oθ2 - Ni(2) - αAsp363 Oδ1      | 174.3                                              | 174.5                                                             | 172.4                 | 173.1                    |
| O <sub>B</sub> - Ni(2) - αHis139 Nε     | 148.5                                              | 149.3                                                             | 155.3                 | 156.8                    |
| O <sub>2</sub> - Ni(2) - αHis137 Nε     | 155.8                                              | 157.1                                                             | 162.6                 | 158.6                    |
| Ni(1) - O <sub>B</sub> - Ni(2)          | 119.0                                              | 117.8                                                             | 122.1                 | 125.8                    |

**Figure 1-SI.** Per residue C $\alpha$  RMSD calculated between the  $\alpha$ ,  $\beta$  and  $\gamma$  subunits (coloured red, magenta and blue, respectively) of SPU co-crystallized in the presence of Au(PEt<sub>3</sub>)I (**3**, PDB code P7PN) (upper panel) and Au(PEt<sub>3</sub>)<sub>2</sub>Cl (**4**, PDB code P7PO) (bottom panel) with respect to native SPU (PDB code 4CEU).

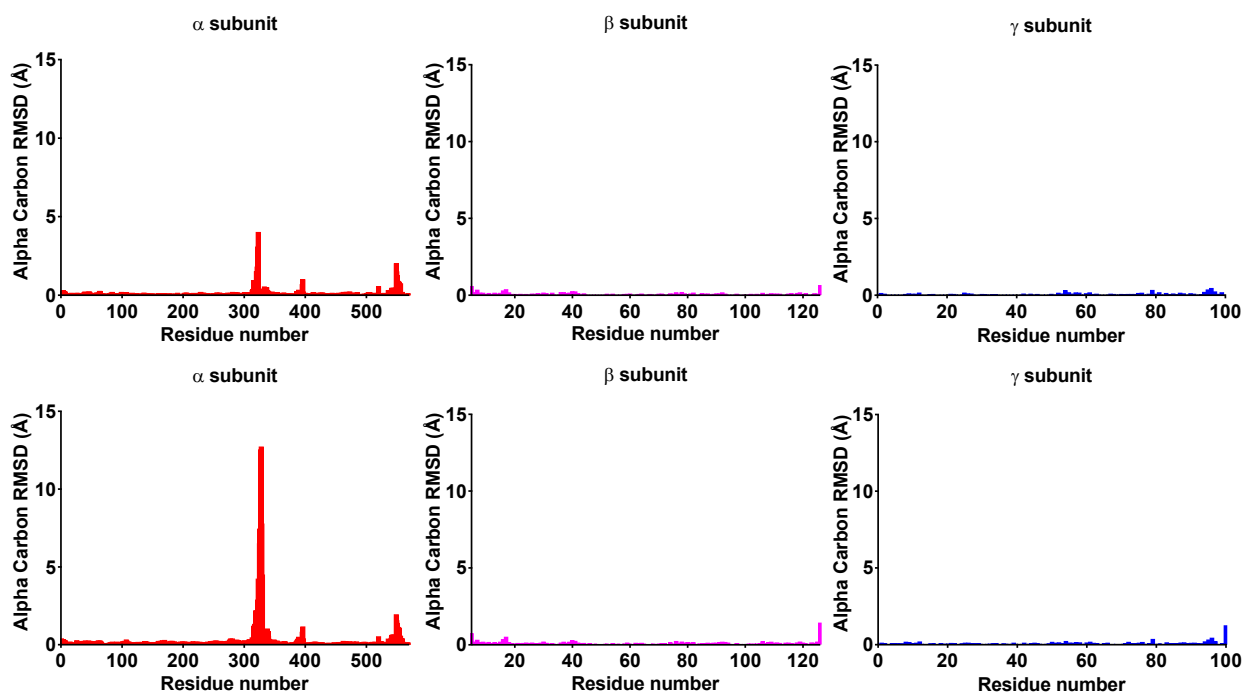

**Figure 2-SI.** Per residue C $\alpha$  RMSD calculated between the  $\alpha$ ,  $\beta$  and  $\gamma$  subunits (coloured black, dark grey and grey, respectively) of SPU co-crystallized in the presence of Au(PEt<sub>3</sub>)I (**3**, PDB code 7P7N) (upper panel) and Au(PEt<sub>3</sub>)<sub>2</sub>Cl (**4**, PDB code 7P7O) (bottom panel) with respect to Au(I)-inhibited SPU (PDB code 6I9Y).

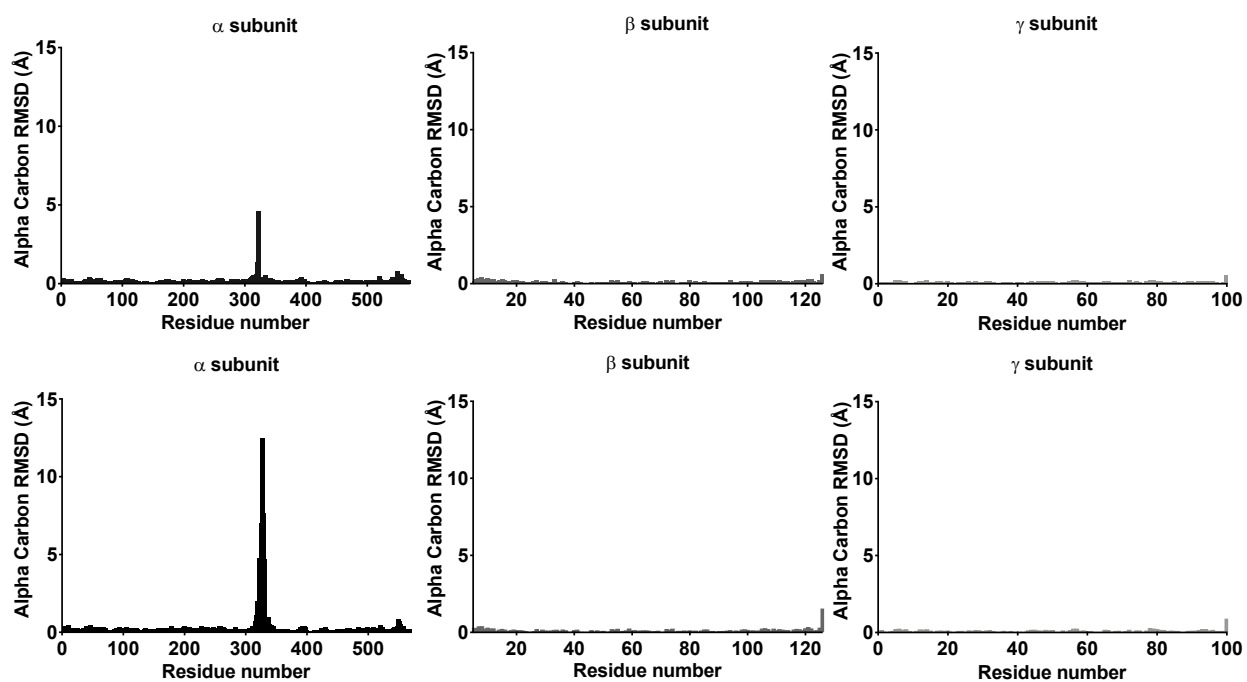

Supplement: d1dt02488d1.pdf [file d1dt02488d1.pdf]
